# Supplementary material for: IgA binds to the AD‐2 epitope of glycoprotein B and neutralizes human cytomegalovirus
Source: PubMed Central journal article supplement (PMC7884650; doi:10.1111/imm.13286), 2020-12-13
Supplement: IMM-162-314-s004.pdf [file IMM-162-314-s004.pdf]

## Supplementary figure 4

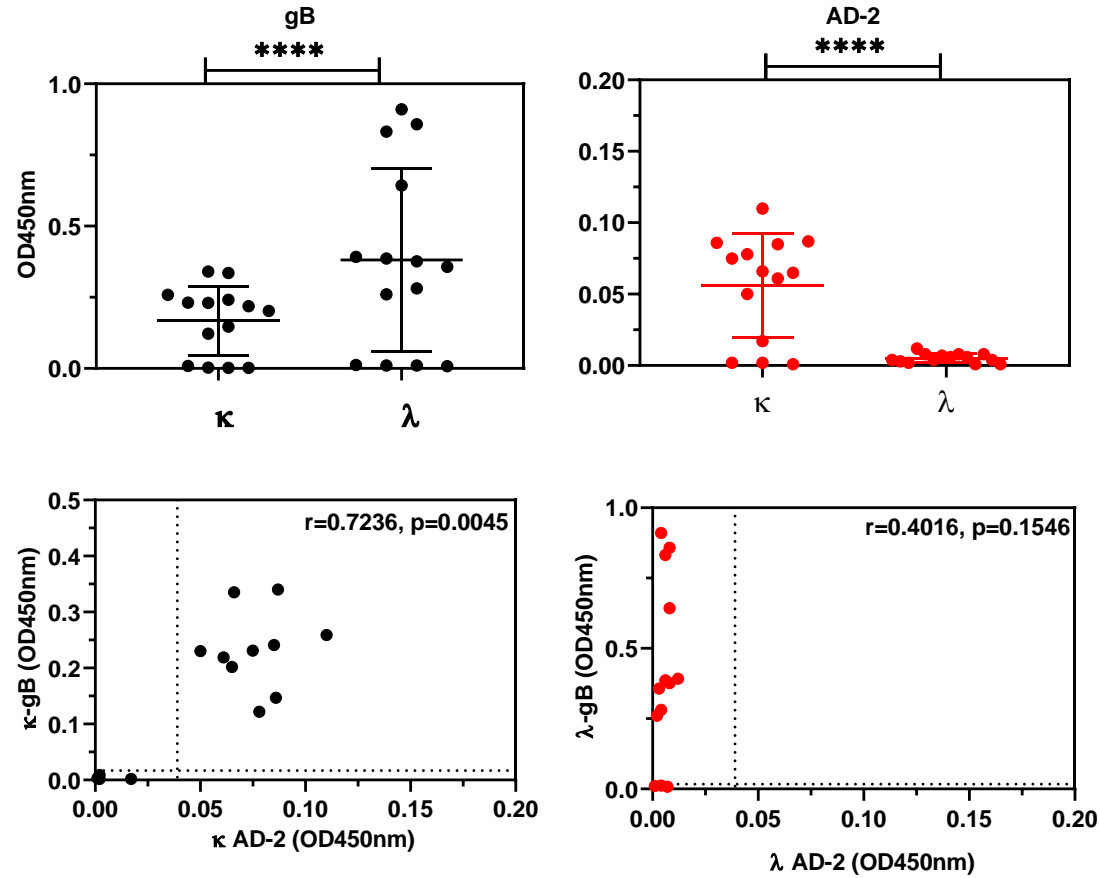

**S Fig 4A:** Usage of kappa ( $\kappa$ ) and lambda ( $\lambda$ ) L-chains by undiluted human milk antibodies binding to gB and AD-2 epitope. Statistical differences between the mean OD values of antibodies containing the indicated L-chains for binding to gB and AD-2 epitope was obtained by Mann-Whitney test (\*\*\*\*  $P < .0001$ ).

**S Fig 4B:** Correlations of kappa ( $\kappa$ ) and lambda ( $\lambda$ ) L-chains usage by human milk antibodies binding to gB and AD-2 epitope. Vertical (AD-2) and horizontal (gB) dotted lines represent cut offs for negative kappa and negative lambda samples respectively. Spearman's correlations and p values are shown.
